# Supplementary material
Source: publisher figshare collection journal article supplement (https://acs.figshare.com/ndownloader/files/4063132)
Supplement: Supplementary file 1 [file 4063132]

## Supporting Information

### Rational Design of Fatty Acid Amide Hydrolase Inhibitors that Act by Covalently Bonding to Two Active Site Residues

Katerina Otrubova,<sup>†,#</sup> Monica Brown,<sup>§</sup> Michael S. McCormick,<sup>§</sup> Gye W. Han,<sup>§</sup> Scott T. O'Neal,<sup>x</sup>  
Benjamin F. Cravatt,<sup>‡,#</sup> Raymond C. Stevens,<sup>§,#</sup> Aron H. Lichtman,<sup>x</sup> and Dale L. Boger<sup>\*,†,#</sup>

*Department of Chemistry,<sup>†</sup> Chemical Physiology,<sup>‡</sup> Molecular Biology,<sup>§</sup> and The Skaggs Institute for  
Chemical Biology,<sup>#</sup> The Scripps Research Institute, 10550 North Torrey Pines Road, La Jolla,  
California 92037 and Department of Pharmacology and Toxicology,<sup>x</sup> Virginia Commonwealth  
University, Richmond, VA 23298*

#### (6-Chloropyridin-3-yl)methanol (**S1**)

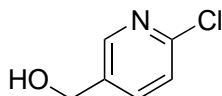

Methyl 6-chloronicotinate (1.00 g, 5.83 mmol) was dissolved in THF (20 mL) and cooled to 0 °C. LiAlH<sub>4</sub> (220.96 mg, 5.83 mmol) was added portionwise. The mixture was allowed to slowly warm to room temperature and after 2 h the reaction was quenched with the addition of 5% HOAc in EtOH (1 mL). The solution was diluted with EtOAc, washed with 1 M HCl, saturated aqueous NaCl, and dried over Na<sub>2</sub>SO<sub>4</sub>. Evaporation yielded the crude alcohol that was purified by flash chromatography (SiO<sub>2</sub>, 50% EtOAc–hexanes) to yield the alcohol (736 mg, 88%) as a white solid: <sup>1</sup>H NMR (CDCl<sub>3</sub>, 400 MHz) δ 8.66 (s, 1H), 8.07 (d, 1H, *J* = 7.4 Hz), 7.34 (d, 1H, *J* = 7.5 Hz), 4.61 (s, 2H), 3.65 (br s, 1H); <sup>13</sup>C NMR (CDCl<sub>3</sub>, 125 MHz) δ 149.6, 147.4, 137.4, 135.2, 123.7, 60.9.

#### 2-Chloro-5-((methoxymethoxy)methyl)pyridine (**S2**)

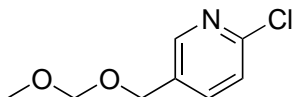

(6-Chloropyridin-3-yl)methanol (**S1**, 500 mg, 3.48 mmol) and *N,N*-diisopropyl ethylamine (0.75 mL, 4.18 mmol) were dissolved in anhydrous THF (10 mL) and the mixture was cooled to 0 °C. Chloromethylmethyl ether (0.3 mL, 4.18 mmol) was added dropwise and the mixture was allowed to warm to room temperature and stirred for 6 h. The mixture was diluted with EtOAc, washed with saturated aqueous NaCl and dried over Na<sub>2</sub>SO<sub>4</sub>. Evaporation in vacuo yielded the crude product that was purified by flash chromatography (SiO<sub>2</sub>, 40% EtOAc–hexanes) to yield **S2** (437 mg, 67%) as a clear oil: <sup>1</sup>H NMR (CDCl<sub>3</sub>, 500 MHz) δ 8.66 (s, 1H), 8.07 (d, 1H, *J* = 7.4 Hz), 7.34 (d, 1H, *J* = 7.5 Hz), 4.50 (s, 2H), 4.48 (s, 2H), 3.30 (s, 3H); <sup>13</sup>C NMR (CDCl<sub>3</sub>, 125 MHz) δ 150.4, 149.5, 137.4, 131.2, 123.7, 97.2, 71.2, 55.6.

### 2-(6-Chloropyridin-3-yl)acetonitrile (**S3**)

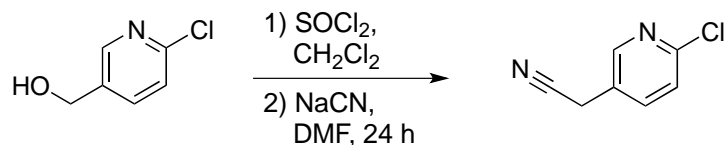

(6-Chloropyridin-3-yl)methanol (**S1**, 100 mg, 0.700 mmol) was first converted to the chloride by addition of thionyl chloride (0.2 mL, 0.840 mmol) in CH<sub>2</sub>Cl<sub>2</sub> (2 mL). The reaction mixture was allowed to stir for 2 h and the solvent was evacuated under N<sub>2</sub>. The resulting crude chloride was redissolved in DMF (2 mL) to which sodium cyanide (103 mg, 2.10 mmol) was added. The mixture was allowed to stir under Ar for 24 h at which time the mixture was diluted with EtOAc, washed with saturated aqueous NaCl and dried over Na<sub>2</sub>SO<sub>4</sub>. Evaporation in vacuo yielded the crude product that was purified by flash chromatography (SiO<sub>2</sub>, 60% EtOAc–hexanes) to yield **S3** (47 mg, 45% over 2 steps) as a light yellow solid: <sup>1</sup>H NMR (CDCl<sub>3</sub>, 400 MHz) δ 8.53 (s, 1H), 7.86 (d, 1H, *J* = 7.4 Hz), 7.21 (d, 1H, *J* = 7.5 Hz), 4.38 (s, 2H); <sup>13</sup>C NMR (CDCl<sub>3</sub>, 125 MHz) δ 150.4, 149.5, 138.4, 131.2, 123.5, 117.2, 20.7.

### 2-(1-((*tert*-Butyldimethylsilyl)oxy)-7-phenylheptyl)-5-(5-((methoxymethoxy)methyl)-pyridin-2-yl)oxazole (**8**)

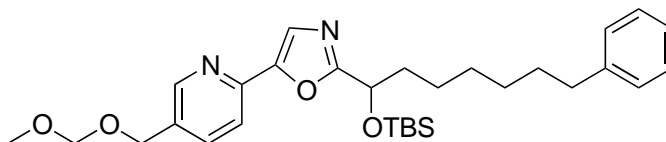

5-Tributylstannyl oxazole **5** (200 mg, 0.302 mmol), Pd(PPh<sub>3</sub>)<sub>4</sub> (35 mg, 0.03 mmol) and 2-chloro-5-((methoxymethoxy)methyl)pyridine (**S2**, 68 mg, 0.362 mmol) were dissolved in anhydrous 1,4-dioxane (3 mL) and the mixture was warmed at reflux for 16 h under Ar. The mixture was diluted with EtOAc, washed with saturated aqueous NaCl, and dried over Na<sub>2</sub>SO<sub>4</sub>. Flash chromatography (SiO<sub>2</sub>, 15% EtOAc–hexanes) afforded **8** (93 mg, 59%; typically 42–60%) as a colorless oil: <sup>1</sup>H NMR (CDCl<sub>3</sub>, 500 MHz) δ 8.52 (s, 1H), 8.07 (d, 1H, *J* = 7.4 Hz), 7.86 (d, 1H, *J* = 7.5 Hz), 7.40–7.38 (m, 2H), 7.29–7.26 (m, 3H), 7.18 (s, 1H), 4.93 (s, 2H), 4.50 (s, 2H), 3.98 (t, 1H, *J* = 6.5 Hz), 3.30 (s, 3H), 2.65 (t, 2H, *J* = 6.5 Hz), 1.68–1.66 (m, 4H), 1.44–1.42 (m, 6H), 1.02 (s, 9H), 0.32 (s, 6H); <sup>13</sup>C NMR (CDCl<sub>3</sub>, 125 MHz) δ 160.3, 155.0, 148.4, 143.1, 137.5, 129.8, 128.6, 128.0 (2C), 125.1, 123.9, 122.5, 97.2, 78.4, 71.2, 55.6, 39.7, 35.7, 32.8, 31.8, 30.9, 29.2 (2C), 25.4 (4C), -5.2, -5.3; HRMS-ESI-TOF *m/z* 524.7670 ([M+H]<sup>+</sup>, C<sub>30</sub>H<sub>44</sub>N<sub>2</sub>O<sub>4</sub>Si requires 524.7669).

### 1-(5-(5-((Methoxymethoxy)methyl)pyridin-2-yl)-7-phenylheptan-1-ol (**9**)

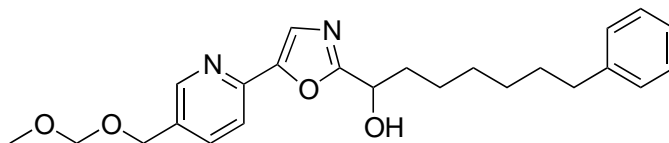

2-(1-((*tert*-Butyldimethylsilyl)oxy)-7-phenylheptyl)-5-(5-((methoxymethoxy)methyl)pyridin-2-yl)oxazole (**8**, 90 mg, 0.172 mmol) was dissolved in THF (1.5 mL), treated with Bu<sub>4</sub>NF (1 M in THF, 0.2 mL, 0.206 mmol) and the solution was stirred at room temperature for 2 h under Ar. The reaction mixture was diluted with EtOAc, washed with saturated aqueous NaCl, dried over Na<sub>2</sub>SO<sub>4</sub> and the solvent was removed under reduced pressure. Flash chromatography (SiO<sub>2</sub>, 60% EtOAc–hexanes) yielded **9** (61 mg, 87%) as a yellow oil: <sup>1</sup>H NMR (CDCl<sub>3</sub>, 500 MHz) δ 8.52 (s, 1H), 8.07 (d, 1H, *J* = 7.4

Hz), 7.86 (d, 1H,  $J = 7.5$  Hz), 7.40–7.38 (m, 2H), 7.29–7.26 (m, 3H), 7.18 (s, 1H), 4.93 (s, 2H), 4.50 (s, 2H), 3.98 (t, 1H,  $J = 6.5$  Hz), 3.30 (s, 3H), 2.65 (t, 2H,  $J = 6.5$  Hz), 1.68–1.66 (m, 4H), 1.44–1.42 (m, 6H);  $^{13}\text{C}$  NMR ( $\text{CDCl}_3$ , 150 MHz)  $\delta$  160.3, 155.0, 150.0, 148.4, 143.1, 137.5, 129.8, 128.6 (2C), 128.0 (2C), 125.1, 123.9, 122.5, 97.2, 75.4, 71.2, 55.6, 38.7, 35.7, 32.8, 31.2, 29.8 (2C); HRMS-ESI-TOF  $m/z$  410.5058 ( $[\text{M}+\text{H}]^+$ ,  $\text{C}_{24}\text{H}_{30}\text{N}_2\text{O}_4$  requires 410.5060).

### 1-(5-(5-((Methoxymethoxy)methyl)pyridin-2-yl)-7-phenylheptan-1-one (10)

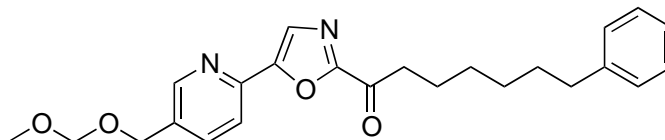

1-(5-(5-((Methoxymethoxy)methyl)pyridin-2-yl)-7-phenylheptan-1-ol (**9**, 50 mg, 0.123 mmol) was dissolved in  $\text{CH}_2\text{Cl}_2$  (1.5 mL) and Dess–Martin periodinane (62 mg, 0.146 mmol) was added. The mixture was stirred at room temperature for 2 h. The reaction mixture was reduced by half volume and adsorbed directly onto  $\text{SiO}_2$ . Flash chromatography ( $\text{SiO}_2$ , 20% EtOAc–hexanes) yielded **10** (44 mg, 88%) as a white solid:  $^1\text{H}$  NMR ( $\text{CDCl}_3$ , 500 MHz)  $\delta$  8.52 (s, 1H), 8.07 (d, 1H,  $J = 7.4$  Hz), 7.86 (d, 1H,  $J = 7.5$  Hz), 7.40–7.38 (m, 2H), 7.29–7.26 (m, 3H), 7.18 (s, 1H), 4.93 (s, 2H), 4.50 (s, 2H), 3.30 (s, 3H), 2.81 (t, 2H,  $J = 6.3$  Hz), 2.65 (t, 2H,  $J = 6.5$  Hz), 1.68–1.66 (m, 4H), 1.44–1.42 (m, 4H);  $^{13}\text{C}$  NMR ( $\text{CDCl}_3$ , 150 MHz)  $\delta$  197.5, 160.3, 155.0, 150.0, 148.4, 143.1, 137.5, 129.8, 128.6 (2C), 128.0 (2C), 125.1, 123.9, 122.5, 97.2, 71.2, 55.6, 38.7, 35.7, 32.8, 31.2, 29.8 (2C); HRMS-ESI-TOF  $m/z$  408.4902 ( $[\text{M}+\text{H}]^+$ ,  $\text{C}_{24}\text{H}_{28}\text{N}_2\text{O}_4$  requires 408.4901).

### 1-(5-(5-(Hydroxymethyl)pyridin-2-yl)oxazol-2-yl)-7-phenylheptan-1-one (11)

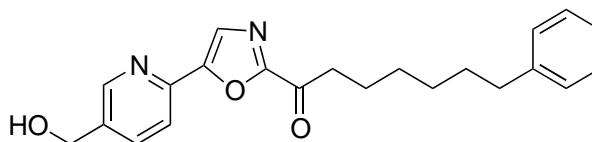

1-(5-(5-((Methoxymethoxy)methyl)pyridin-2-yl)-7-phenylheptan-1-one (**10**, 40 mg, 0.098 mmol) was dissolved in  $\text{CH}_2\text{Cl}_2$  (1 mL) and cooled to 0 °C. A solution of 4 N HCl in 1,4-dioxane (0.2 mL, 0.12 mmol) was added. The mixture was stirred at room temperature for 2 h before the solvent was removed under  $\text{N}_2$  to afford the crude alcohol which was then diluted with EtOAc, washed with saturated aqueous NaCl and dried over  $\text{Na}_2\text{SO}_4$ . This solvent was removed under reduced pressure and the mixture was subsequently purified by flash chromatography ( $\text{SiO}_2$ , 75% EtOAc–hexanes) to yield **11** (20 mg, 56%) as a white solid:  $^1\text{H}$  NMR ( $\text{CDCl}_3$ , 500 MHz)  $\delta$  8.52 (s, 1H), 8.07 (d, 1H,  $J = 7.4$  Hz), 7.86 (d, 1H,  $J = 7.5$  Hz), 7.40–7.38 (m, 2H), 7.29–7.26 (m, 3H), 7.18 (s, 1H), 4.61 (s, 2H), 2.81 (t, 2H,  $J = 6.3$  Hz), 2.65 (t, 2H,  $J = 6.5$  Hz), 1.68–1.66 (m, 4H), 1.44–1.42 (m, 4H);  $^{13}\text{C}$  NMR ( $\text{CDCl}_3$ , 150 MHz)  $\delta$  197.5, 160.3, 155.0, 150.0, 148.4, 143.1, 137.5, 129.8, 128.6 (2C), 128.0 (2C), 125.1, 123.9, 122.5, 64.7, 38.7, 35.7, 32.8, 31.2, 29.8 (2C); HRMS-ESI-TOF  $m/z$  364.4377 ( $[\text{M}+\text{H}]^+$ ,  $\text{C}_{22}\text{H}_{24}\text{N}_2\text{O}_3$  requires 364.4376).

### 1-(5-(5-(Bromomethyl)pyridin-2-yl)-7-phenylheptan-1-one (3)

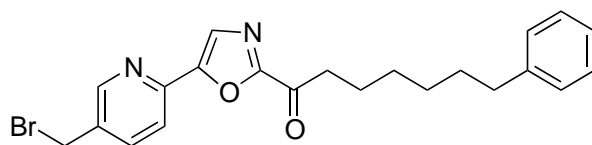

1-(5-(5-(Hydroxymethyl)pyridin-2-yl)oxazol-2-yl)-7-phenylheptan-1-one (**11**, 20 mg, 0.055 mmol) and  $\text{CBr}_4$  (20 mg, 0.06 mmol) were dissolved in  $\text{CH}_2\text{Cl}_2$  (1 mL). The mixture was cooled to 0 °C and triphenylphosphine (16 mg, 0.06 mmol) was added in small portions. The reaction mixture was warmed to room temperature and stirred for 1 h. The mixture was diluted with EtOAc, washed with saturated aqueous NaCl and dried over  $\text{Na}_2\text{SO}_4$ . The solvent was removed under reduced pressure and flash chromatography ( $\text{SiO}_2$ , 30% EtOAc–hexanes) yielded **3** (10 mg, 45%) as a white solid:  $^1\text{H}$  NMR ( $\text{CDCl}_3$ , 500 MHz)  $\delta$  8.39 (s, 1H), 7.94 (d, 1H,  $J = 7.4$  Hz), 7.62 (d, 1H,  $J = 7.5$  Hz), 7.40–7.38 (m, 2H), 7.29–7.26 (m, 3H), 7.18 (s, 1H), 4.56 (s, 2H), 2.81 (t, 2H,  $J = 6.3$  Hz), 2.65 (t, 2H,  $J = 6.5$  Hz), 1.68–1.66 (m, 4H), 1.44–1.42 (m, 4H);  $^{13}\text{C}$  NMR ( $\text{CDCl}_3$ , 150 MHz)  $\delta$  198.4, 160.3, 155.0, 150.0, 148.4, 143.1, 137.5, 129.8, 128.6 (2C), 128.0 (2C), 125.1, 123.9, 122.5, 38.7, 35.7, 33.3, 32.8, 31.2, 29.8 (2C); HRMS-ESI-TOF  $m/z$  427.3346 ( $[\text{M}+\text{H}]^+$ ,  $\text{C}_{22}\text{H}_{23}\text{BrN}_2\text{O}_2$  requires 427.3342).

### 2-(6-(2-(1-((*tert*-Butyldimethylsilyl)oxy)-7-phenylheptyl)oxazol-5-yl)pyridin-3-yl)acetonitrile (6)

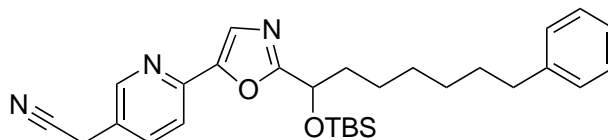

5-Tributylstannyl oxazole **5** (100 mg, 0.150 mmol),  $\text{Pd}(\text{PPh}_3)_4$  (17 mg, 0.015 mmol), and 2-(6-chloropyridin-3-yl)acetonitrile (**S3**, 27 mg, 0.180 mmol) were dissolved in anhydrous 1,4-dioxane (2 mL) and the mixture was warmed at reflux for 16 h under Ar. The reaction mixture was diluted with EtOAc, washed with saturated aqueous NaCl, dried over  $\text{Na}_2\text{SO}_4$  and the solvent was removed under reduced pressure. Flash chromatography ( $\text{SiO}_2$ , 30% EtOAc–hexanes) yielded **6** (50 mg, 67%) as a tan oil:  $^1\text{H}$  NMR ( $\text{CDCl}_3$ , 500 MHz)  $\delta$  8.39 (s, 1H), 7.94 (d, 1H,  $J = 7.4$  Hz), 7.62 (d, 1H,  $J = 7.5$  Hz), 7.40–7.38 (m, 2H), 7.29–7.26 (m, 3H), 7.18 (s, 1H), 4.50 (t, 1H,  $J = 6.3$  Hz), 4.33 (s, 2H), 2.65 (t, 2H,  $J = 6.5$  Hz), 1.68–1.66 (m, 4H), 1.44–1.42 (m, 6H), 0.98 (s, 9H), 0.24 (s, 6H);  $^{13}\text{C}$  NMR ( $\text{CDCl}_3$ , 150 MHz)  $\delta$  167.3, 155.0, 150.0, 148.4, 143.1, 137.5, 129.8, 128.6 (2C), 128.0 (2C), 125.1, 123.9, 122.5, 75.3, 38.7, 35.7, 32.8, 31.2, 30.9, 29.8 (2C), 25.9 (3C), 20.9, -5.2, -5.3, -5.4; HRMS-ESI-TOF  $m/z$  489.7238 ( $[\text{M}+\text{H}]^+$ ,  $\text{C}_{29}\text{H}_{39}\text{N}_3\text{O}_2\text{Si}$  requires 489.7244).

### 2-(6-(2-(1-Hydroxy-7-phenylheptyl)oxazol-5-yl)pyridin-3-yl)acetonitrile (7)

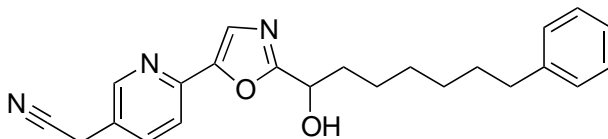

2-(6-(2-(1-((*tert*-Butyldimethylsilyl)oxy)-7-phenylheptyl)oxazol-5-yl)pyridin-3-yl)acetonitrile (**6**, 60 mg, 0.122 mmol) was dissolved in THF (1.2 mL), treated with  $\text{Bu}_4\text{NF}$  (1 M in THF, 0.15 mL, 0.15 mmol) and the solution was stirred at room temperature for 2 h under Ar. The reaction mixture was diluted with EtOAc, washed with saturated aqueous NaCl, dried over  $\text{Na}_2\text{SO}_4$  and the solvent was removed under

reduced pressure. Flash chromatography (SiO<sub>2</sub>, 60% EtOAc–hexanes) yielded **7** (41 mg, 90%) as a yellow oil: <sup>1</sup>H NMR (CDCl<sub>3</sub>, 500 MHz) δ 8.39 (s, 1H), 7.94 (d, 1H, *J* = 7.4 Hz), 7.62 (d, 1H, *J* = 7.5 Hz), 7.40–7.38 (m, 2H), 7.29–7.26 (m, 3H), 7.18 (s, 1H), 4.50 (t, 1H, *J* = 6.3 Hz), 4.33 (s, 2H), 2.65 (t, 2H, *J* = 6.5 Hz), 1.68–1.66 (m, 4H), 1.44–1.42 (m, 6H); <sup>13</sup>C NMR (CDCl<sub>3</sub>, 150 MHz) δ 167.3, 155.0, 150.0, 148.4, 143.1, 137.5, 129.8, 128.6 (2C), 128.0 (2C), 125.1, 123.9, 122.5, 75.3, 38.7, 35.7, 32.8, 31.2, 29.8 (2C), 20.9; HRMS-ESI-TOF *m/z* 375.4632 ([M + H]<sup>+</sup>, C<sub>23</sub>H<sub>25</sub>N<sub>3</sub>O<sub>5</sub> requires 375.4635).

## 2-(6-(2-(7-Phenylheptanol)oxazol-5-yl)pyridin-3-yl)acetonitrile (**4**)

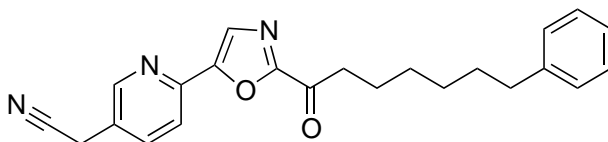

2-(6-(2-(1-Hydroxy-7-phenylheptyl)oxazol-5-yl)pyridin-3-yl)acetonitrile (**7**, 30 mg, 0.080 mmol) was dissolved in CH<sub>2</sub>Cl<sub>2</sub> (1 mL) and Dess–Martin periodinane (40 mg, 0.096 mmol) was added. The mixture was stirred at room temperature for 2 h. The reaction mixture was reduced to half volume and directly loaded onto silica gel and purified by flash chromatography (SiO<sub>2</sub>, 30% EtOAc–hexanes) to yield **4** (17 mg, 85%) as a yellow solid: <sup>1</sup>H NMR (CDCl<sub>3</sub>, 500 MHz) δ 8.39 (s, 1H), 7.94 (d, 1H, *J* = 7.4 Hz), 7.62 (d, 1H, *J* = 7.5 Hz), 7.40–7.38 (m, 2H), 7.29–7.26 (m, 3H), 7.18 (s, 1H), 4.33 (s, 2H), 2.81 (t, 2H, *J* = 6.3 Hz), 2.65 (t, 2H, *J* = 6.5 Hz), 1.68–1.66 (m, 4H), 1.44–1.42 (m, 4H); <sup>13</sup>C NMR (CDCl<sub>3</sub>, 150 MHz) δ 197.4, 167.3, 155.0, 150.0, 148.4, 143.1, 137.5, 129.8, 128.6 (2C), 128.0 (2C), 125.1, 123.9, 122.5, 38.7, 35.7, 32.8, 31.2, 29.8 (2C), 20.9; HRMS-ESI-TOF *m/z* 373.4472 ([M+H]<sup>+</sup>, C<sub>23</sub>H<sub>25</sub>N<sub>3</sub>O<sub>2</sub> requires 373.4476).

## 2-(7-Phenylheptyl)oxazole (**S5**)

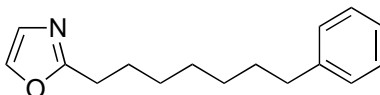

A solution of oxazole (50 mg, 0.725 mmol) in THF (2 mL) was treated with BH<sub>3</sub>•THF (1 M in THF, 800 μL, 0.797 mmol). The reaction mixture was stirred at room temperature for 1 h before it was treated with *n*-BuLi (2.5 M, 320 μL, 0.797 mmol) at -78 °C for 40 min, followed by a solution of Ph(CH<sub>2</sub>)<sub>7</sub>OTf (330 mg, 1.087 mmol) in THF (1 mL). The reaction mixture was stirred at 0 °C for 2 h, then room temperature overnight before it was quenched with H<sub>2</sub>O and extracted with EtOAc. The organic layer was evaporated under reduced pressure and flash chromatography yielded **S5** (80 mg, 46%) as a yellow oil: <sup>1</sup>H NMR (CDCl<sub>3</sub>, 500 MHz) δ 7.68 (s, 1H), 7.36–7.33 (m, 2H), 7.26–7.23 (m, 3H), 7.09 (s, 1H), 3.00 (t, 2H, *J* = 7.5 Hz), 2.69 (t, 2H, *J* = 7.5 Hz), 1.75–1.69 (m, 4H), 1.51–1.47 (m, 6H); <sup>13</sup>C NMR (CDCl<sub>3</sub>, 125 MHz) δ 154.7, 142.6, 139.7, 137.6, 128.5 (2C), 128.1 (2C), 127.0, 125.9, 35.7, 32.4, 31.2, 29.6, 29.4 (2C), 28.1; HRMS-ESI-TOF *m/z* 243.3345 ([M+H]<sup>+</sup>, C<sub>16</sub>H<sub>21</sub>NO requires 243.3340).

## 2-(7-Phenylheptyl)-5-(tributylstannyl)oxazole (**S6**)

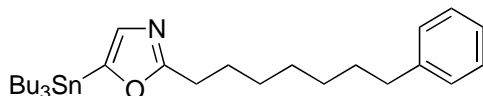

2-(7-Phenylheptyl)oxazole (**S5**, 50 mg, 0.206 mmol) was dissolved in freshly distilled anhydrous THF (2 mL) and cooled to -78 °C before the solution was treated with 2.37 M *n*-BuLi (97 μL, 0.227 mmol)

dropwise. The reaction mixture was stirred for 40 min at -78 °C, treated with  $\text{SnBu}_3\text{Cl}$  (0.15 mL, 0.06 mmol) and stirred for 5 min. The solution was warmed to room temperature and diluted with EtOAc, washed with saturated aqueous NaCl, and dried over  $\text{Na}_2\text{SO}_4$ . The reaction mixture was diluted with EtOAc, washed with saturated aqueous NaCl, dried over  $\text{Na}_2\text{SO}_4$  and the solvent was removed under reduced pressure. Flash chromatography ( $\text{SiO}_2$ , 10% EtOAc–hexanes) yielded **S6** (77 mg, 70%) as a clear oil:  $^1\text{H}$  NMR ( $\text{CDCl}_3$ , 500 MHz)  $\delta$  7.68 (s, 1H), 7.36–7.33 (m, 2H), 7.26–7.23 (m, 3H), 7.09 (s, 1H), 3.00 (t, 2H,  $J$  = 7.5 Hz), 2.69 (t, 2H,  $J$  = 7.5 Hz), 1.75–1.69 (m, 4H), 1.51–1.47 (m, 6H), 0.99 (s, 16H);  $^{13}\text{C}$  NMR ( $\text{CDCl}_3$ , 125 MHz)  $\delta$  154.7, 142.6, 139.7, 137.6, 128.5 (2C), 128.1 (2C), 127.0, 125.9, 35.7, 32.4, 31.2, 29.6, 29.4 (2C), 27.2 (6C), 28.1, 15.6 (3C), 13.8 (3C); HRMS-ESI-TOF  $m/z$  532.3882 ( $[\text{M}+\text{H}]^+$ ,  $\text{C}_{28}\text{H}_{47}\text{NOSn}$  requires 532.3889).

### 2-(6-(2-(7-Phenylheptyl)oxazol-5-yl)pyridin-3-yl)acetonitrile (**13**)

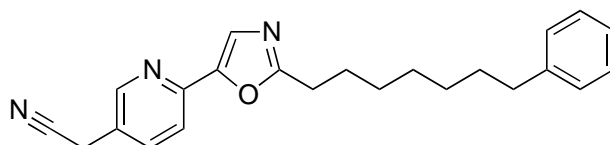

2-(7-Phenylheptyl)-5-(tributylstannyl)oxazole (**S6**, 30 mg, 0.056 mmol),  $\text{Pd}(\text{PPh}_3)_4$  (7 mg, 0.005 mmol), and 2-(6-chloropyridin-3-yl)acetonitrile (**S3**, 11 mg, 0.067 mmol) were dissolved in anhydrous 1,4-dioxane (1.5 mL) and the mixture was warmed at reflux for 16 h under Ar. The reaction mixture was diluted with EtOAc, washed with saturated aqueous NaCl, dried over  $\text{Na}_2\text{SO}_4$  and the solvent was removed under reduced pressure. Flash chromatography ( $\text{SiO}_2$ , 30% EtOAc–hexanes) yielded **13** (10 mg, 54%) as a tan solid:  $^1\text{H}$  NMR ( $\text{CDCl}_3$ , 500 MHz)  $\delta$  8.39 (s, 1H), 7.94 (d, 1H,  $J$  = 7.4 Hz), 7.63 (d, 1H,  $J$  = 7.5 Hz), 7.36–7.33 (m, 2H), 7.26–7.23 (m, 3H), 2.62 (t, 2H,  $J$  = 7.3 Hz), 2.55 (t, 2H,  $J$  = 7.5 Hz), 1.75–1.69 (m, 4H), 1.51–1.47 (m, 6H);  $^{13}\text{C}$  NMR ( $\text{CDCl}_3$ , 125 MHz)  $\delta$  188.1, 156.8, 152.7, 149.0, 145.1, 142.2, 136.0, 133.8, 127.9, 127.8, 126.4, 125.2, 119.6, 65.9, 55.9, 38.6, 35.4, 32.7, 30.9, 28.6, 23.5; HRMS-ESI-TOF  $m/z$  359.4640 ( $[\text{M}+\text{H}]^+$ ,  $\text{C}_{23}\text{H}_{25}\text{N}_3\text{O}$  requires 359.4641).

### 1-(5-(5-(Bromomethyl)pyridin-2-yl)oxazol-2-yl)-7-phenylheptan-1-ol (**12**)

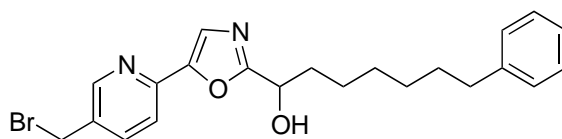

A sample of **3** (12 mg, 0.028 mmol) was dissolved in a 2:1 mixture of MeOH–THF (0.6 mL) and cooled to 0 °C.  $\text{NaBH}_4$  (1.2 mg, 0.031 mmol) was added to the cooled solution and the mixture was allowed to slowly warm to room temperature. After 1 h, the reaction was quenched with the addition of 5% AcOH in EtOH (1 mL) and the mixture was stirred for 30 min. The solution was diluted with EtOAc, washed with water and saturated aqueous NaCl, and dried over  $\text{Na}_2\text{SO}_4$ . Evaporation yielded the crude alcohol that was purified by preparative thin layer chromatography ( $\text{SiO}_2$ , 60% EtOAc–hexanes) to afford **12** (8.2 mg, 89%) as a colorless oil:  $^1\text{H}$  NMR ( $\text{CDCl}_3$ , 500 MHz)  $\delta$  8.39 (s, 1H), 7.94 (d, 1H,  $J$  = 7.4 Hz), 7.62 (d, 1H,  $J$  = 7.5 Hz), 7.40–7.38 (m, 2H), 7.29–7.26 (m, 3H), 7.18 (s, 1H), 4.56 (s, 2H), 4.46 (t, 1H,  $J$  = 6.3 Hz), 2.65 (t, 2H,  $J$  = 6.5 Hz), 1.68–1.66 (m, 4H), 1.44–1.42 (m, 4H);  $^{13}\text{C}$  NMR ( $\text{CDCl}_3$ , 150 MHz)  $\delta$  160.3, 155.0, 150.0, 148.4, 143.1, 137.5, 129.8, 128.6 (2C), 128.0 (2C), 125.1, 123.9, 122.5, 75.6, 38.7, 35.7, 33.3, 32.8, 31.2, 29.8 (2C); HRMS-ESI-TOF  $m/z$  429.3507 ( $[\text{M}+\text{H}]^+$ ,  $\text{C}_{22}\text{H}_{25}\text{BrN}_2\text{O}_2$  requires 429.3501).

## 2-(6-(2-(1-Hydroxy-7-phenylheptyl)oxazol-5-yl)pyridin-3-yl)acetonitrile (**7**)

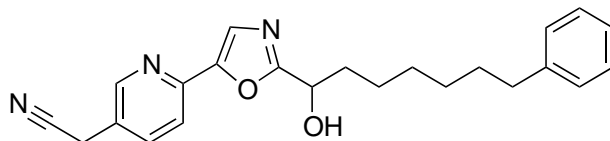

A sample of **4** (18 mg, 0.048 mmol) was dissolved in a 2:1 mixture of MeOH–THF (0.8 mL) and cooled to 0 °C. NaBH<sub>4</sub> (2 mg, 0.053 mmol) was added to the cooled solution and the mixture was allowed to slowly warm to room temperature. After 1 h, the reaction was quenched with the addition of 5% AcOH in EtOH (1 mL) and the mixture was stirred for 30 min. The solution was diluted with EtOAc, washed with water and saturated aqueous NaCl, and dried over Na<sub>2</sub>SO<sub>4</sub>. Evaporation yielded the crude alcohol that was purified by preparative thin layer chromatography (60% EtOAc–hexanes) to afford **7** (15 mg, 84%) as a colorless oil: <sup>1</sup>H NMR (CDCl<sub>3</sub>, 500 MHz) δ 8.39 (s, 1H), 7.94 (d, 1H, *J* = 7.4 Hz), 7.62 (d, 1H, *J* = 7.5 Hz), 7.40–7.38 (m, 2H), 7.29–7.26 (m, 3H), 7.18 (s, 1H), 4.50 (t, 1H, *J* = 6.3 Hz), 4.33 (s, 2H), 2.65 (t, 2H, *J* = 6.5 Hz), 1.68–1.66 (m, 4H), 1.44–1.42 (m, 6H); <sup>13</sup>C NMR (CDCl<sub>3</sub>, 150 MHz) δ 167.3, 155.0, 150.0, 148.4, 143.1, 137.5, 129.8, 128.6 (2C), 128.0 (2C), 125.1, 123.9, 122.5, 75.3, 38.7, 35.7, 32.8, 31.2, 29.8 (2C), 20.9; HRMS-ESI-TOF *m/z* 375.4633 ([M + H]<sup>+</sup>, C<sub>23</sub>H<sub>25</sub>N<sub>3</sub>O<sub>5</sub> requires 375.4635).

## PD Studies of **3** and comparison with **4**

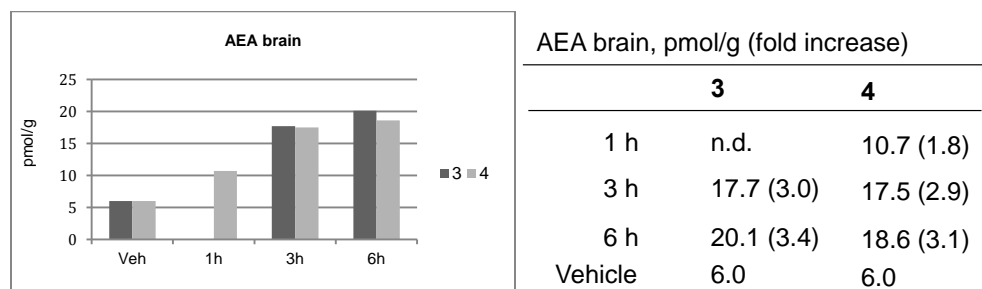

**Figure S1.** Brain AEA levels 1-6 h post administration of **3**, i.p. at 30 mg/kg, and comparison with the effects of **4** reported in Figure 9.

## ABPP screen of 3 and 4

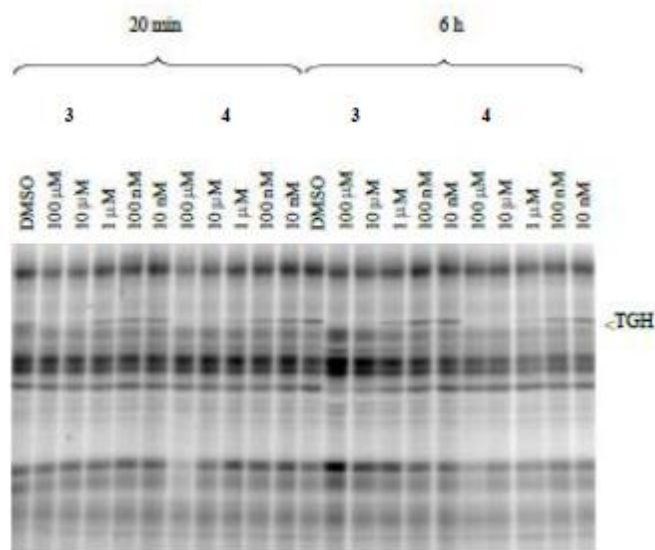

**Figure S2.** ABPP screen of **3** and **4** in mouse heart membrane proteome (1 mg/mL) with FP-rhodamine (100 nM). Inhibitor preincubation with the proteome was conducted at both 20 min and 6 h.

| <chem>c1ccc(cc1)CCCCCCC(=O)Oc2cc3ncc(C4=CC=CC=C4)cc3o2</chem> |            |           |           |                  |                  |                  |             |             |                  |     |
|---------------------------------------------------------------|------------|-----------|-----------|------------------|------------------|------------------|-------------|-------------|------------------|-----|
| OL-135                                                        |            |           |           |                  |                  |                  |             |             |                  |     |
| PK is linear (iv, 3 h post injection Cp)                      |            |           |           |                  |                  |                  |             |             |                  |     |
|                                                               | Dose       | Cp        | Cp ratio  | Dose ratio       |                  |                  |             |             |                  |     |
|                                                               | 2 mg/kg    | 0.016 μM  |           |                  |                  |                  |             |             |                  |     |
|                                                               | 6 mg/kg    | 0.063 μM  | 3.5       | 3                |                  |                  |             |             |                  |     |
|                                                               | 20 mg/kg   | 0.149 μM  | 11.3      | 10               |                  |                  |             |             |                  |     |
|                                                               | 30 mg/kg   | 0.254 μM  | 15.6      | 15               |                  |                  |             |             |                  |     |
|                                                               | 100 mg/kg  | 0.928 μM  | 56.8      | 50               |                  |                  |             |             |                  |     |
| Rat                                                           | Cl         | Vz        | Vss       | T <sub>1/2</sub> | C <sub>max</sub> | C <sub>max</sub> | AUCINF      | AUCIast     | T <sub>max</sub> | %F  |
| IV (2 mg/kg)<br>(n = 3)                                       | 8.5 L/h/kg | 34.9 L/kg | 10.1 L/kg | 2.8 h            | 5.4 μM           | 1808 μg/L        | 235 h*μg/L  | 219 h*μg/L  |                  |     |
| IV (20 mg/kg)<br>(n = 2)                                      | 7.2 L/h/kg | 37.7 L/kg | 9.5 L/kg  | 3.6 h            | 66.3 μM          | 22158 μg/L       | 2784 h*μg/L | 2714 h*μg/L |                  |     |
| oral (10 mg/kg)<br>(n = 3)                                    |            |           |           |                  | 0.16 μM          | 53 μg/L          | 216 h*μg/L  | 127 h*μg/L  | 0.5 h            | 18% |
| from IV @20 mg/kg: plasma:brain conc equal (0.5-6 h).         |            |           |           |                  |                  |                  |             |             |                  |     |

**Figure S3.** PK data on compound **2**.
